1 **Revised March 18, 2020**

2 **Conductance mechanisms of rapidly desensitizing cation channelrhodopsins from**  
3 **cryptophyte algae**

4 Oleg A. Sineshchekov<sup>1</sup>, Elena G. Govorunova<sup>1</sup>, Hai Li<sup>1</sup>, Yumei Wang<sup>1</sup>, Michael Melkonian<sup>2</sup>,  
5 Gane K.-S. Wong<sup>3,4</sup>, Leonid S. Brown<sup>5</sup> and John L. Spudich<sup>1#</sup>

6 <sup>1</sup>Center for Membrane Biology, Department of Biochemistry & Molecular Biology, The  
7 University of Texas Health Science Center at Houston McGovern Medical School, Houston,  
8 Texas, USA

9 <sup>2</sup>Institute of Botany, Cologne Biocenter, University of Cologne, Cologne, Germany

10 <sup>3</sup>Departments of Biological Sciences and of Medicine, University of Alberta, Edmonton, Alberta,  
11 Canada

12 <sup>4</sup>Beijing Genomics Institute-Shenzhen, Shenzhen, China

13 <sup>5</sup>Department of Physics and Biophysics Interdepartmental Group, University of Guelph, Guelph,  
14 Ontario, Canada.

15 Running title: Rapidly desensitizing cation channelrhodopsins

16 # Address correspondence to John L. Spudich, [john.l.spudich@uth.tmc.edu](mailto:john.l.spudich@uth.tmc.edu).

17 Word count Abstract: 334

18 Word count Text: 4,619

19

*Rapidly desensitizing cation channelrhodopsins*

20 ABSTRACT

21 Channelrhodopsins guide algal phototaxis and are widely used as optogenetic probes for  
22 control of membrane potential with light. “Bacteriorhodopsin-like” cation channelrhodopsins  
23 (BCCRs) from cryptophytes differ in primary structure from other CCRs, lacking usual residues  
24 important for their cation conductance. Instead, BCCR sequences match more closely those of  
25 rhodopsin proton pumps, containing residues responsible for critical proton transfer reactions.  
26 We report 19 new BCCRs, which, together with the earlier 6 known members of this family,  
27 form three branches (subfamilies) of a phylogenetic tree. Here we show that the conductance  
28 mechanisms in two subfamilies differ with respect to involvement of the homolog of the proton  
29 donor in rhodopsin pumps. Two BCCRs from the genus *Rhodomonas* generate photocurrents  
30 that rapidly desensitize under continuous illumination. Using a combination of patch clamp  
31 electrophysiology, absorption and Raman spectroscopy, and flash photolysis, we found that the  
32 desensitization is due to rapid accumulation of a long-lived nonconducting intermediate of the  
33 photocycle with unusually blue-shifted absorption with a maximum at 330 nm. These  
34 observations reveal diversity within the BCCR family and contribute to deeper understanding of  
35 their independently evolved cation channel function.

36 IMPORTANCE

37 Cation channelrhodopsins, light-gated channels from flagellate green algae, are  
38 extensively used as optogenetic photoactivators of neurons in research and recently have  
39 progressed to clinical trials for vision restoration. However, the molecular mechanisms of their  
40 photoactivation remain poorly understood. We recently identified cryptophyte cation  
41 channelrhodopsins, structurally different from those of green algae, which have separately  
42 evolved to converge on light-gated cation conductance. This study reveals diversity within this

### *Rapidly desensitizing cation channelrhodopsins*

43 new protein family and describes a subclade with unusually rapid desensitization that results in  
44 short transient photocurrents in continuous light. Such transient currents have not been observed  
45 in the green algae channelrhodopsins and are potentially useful in optogenetic protocols. Kinetic  
46 UV-vis spectroscopy and photoelectrophysiology reveal the desensitization is caused by rapid  
47 accumulation of a non-conductive photointermediate in the photochemical reaction cycle. The  
48 absorption maximum of the intermediate is 330 nm, the shortest wavelength reported in any  
49 rhodopsin, indicating a novel chromophore structure.

### 50 INTRODUCTION

51 Channelrhodopsins are light-gated channels first discovered in green (chlorophyte)  
52 flagellate algae, in which they serve as photoreceptors mediating phototaxis by depolarization of  
53 the cell membrane (1-3). Currently, channelrhodopsins are widely used for control of neurons  
54 and other excitable cells with light (“optogenetics”) (4) for research and also in clinical trials to  
55 restore vision to the blind (5). Channelrhodopsins from chlorophyte algae conduct cations and  
56 are therefore referred to as cation channelrhodopsins (CCRs). Anion-conducting  
57 channelrhodopsins (ACRs) have been found in the phylogenetically distant cryptophyte algae (6)  
58 and a second family more recently in environmental DNA samples of unidentified origin (7).  
59 These three channelrhodopsin families share ~50% of overall sequence homology, including  
60 several key residues shown to be required for their channel activity.

61 However, cryptophyte genomes also encode a family of microbial rhodopsins that show a  
62 higher sequence homology to haloarchaeal proton-pumping rhodopsins than to any known  
63 channelrhodopsins, and yet exhibit cation channel activity, apparently a product of convergent  
64 evolution (8-10). In particular, these proteins contain homologs of the two carboxylate residues  
65 that serve as the Schiff base proton acceptor and donor in *Halobacterium salinarum*

*Rapidly desensitizing cation channelrhodopsins*

66 bacteriorhodopsin (Asp85 and Asp96, respectively), which together with the Thr89 homolog  
67 form the “DTD” motif characteristic of proton pumps. In contrast, in all other known  
68 channelrhodopsins one or both of these positions are occupied by non-carboxylate residues.

69 Earlier we have shown that channel activity in CCRs 1 and 2 from the cryptophyte alga  
70 *Guillardia theta* (*GtCCR1* and *GtCCR2*) is mechanistically distinct from that in chlorophyte  
71 CCRs (9). According to our model, channel opening in these proteins requires deprotonation of  
72 the Asp96 homolog and occurs >10-fold faster than reprotonation of the retinylidene Schiff base.  
73 The latter is achieved by return of the proton from the earlier protonated acceptor, thus  
74 preventing vectorial proton translocation across the membrane. To emphasize their distinction  
75 from other known CCRs, we named these proteins “bacteriorhodopsin-like cation  
76 channelrhodopsins” (BCCRs) (9).

77 Besides their fundamental importance as independently evolved light-gated cation  
78 channels, BCCRs have attracted attention as optogenetic tools, because some of them exhibit  
79 more red-shifted absorption enabling use of deeper penetrating long wavelength light and a  
80 higher  $\text{Na}^+/\text{H}^+$  permeability ratio favorable for neuron depolarization with minimal acidification  
81 (8,11) compared to blue-light activated channelrhodopsin 2 from *Chlamydomonas reinhardtii*  
82 (*CrChR2*), the molecule that so far has been most popular in optogenetic studies (12). Recently  
83 ChRmine, a BCCR, has been used successfully to activate mouse neocortical neurons with  
84 orange light (13).

85 Here we describe 19 BCCRs from 9 cryptophyte species, the protein sequences of which  
86 form two separate branches (subfamilies) of the phylogenetic tree (Fig. 1A) in addition to that  
87 comprising the previously characterized *GtCCR1* and *GtCCR2*. Two of these proteins derived  
88 from two *Rhodomonas* species utilize a different activation mechanism and exhibit rapid

## *Rapidly desensitizing cation channelrhodopsins*

89 desensitization of photocurrent under continuous illumination. We show that the photochemical  
90 cycle of these channelrhodopsins involves accumulation of an extremely short-wavelength-  
91 absorbing and long-living intermediate responsible for fast inactivation of their photocurrents.  
92 These observations reveal diversity within the BCCR family and contribute to deeper  
93 understanding of their cation channel function independently evolved from chlorophyte CCRs.

## 94 RESULTS

### 95 *Identification and electrophysiological screening of BCCR homologs*

96 Using probabilistic inference methods based on profile hidden Markov models (14) built  
97 on previously known BCCR sequences from *G. theta*, we identified 19 new BCCR homologs  
98 from nine marine cryptophyte strains included in the ongoing algal transcriptome sequencing  
99 projects (15,16). The majority were cold-water species (from the Arctic or Antarctic), but  
100 *Rhodomonas lens* was from the Gulf of Mexico and *R. salina*, from Milford, Connecticut. The  
101 previously unclassified strain CCMP 2293 has recently been allocated to the new genus  
102 *Baffinella* (as *B. frigidus*) (17).

103 Table 1 lists GenBank accession numbers, source organisms, transcript names, and  
104 abbreviated protein names of the BCCR homologs identified in this study. In the abbreviated  
105 protein names, the first two or three letters stand for the beginning letters of the genus and  
106 species name. One of the sequences derived from *Rhodomonas lens* (*RICCR1*) exactly matched  
107 the sequence recently reported under the name “ChRmine” and attributed to the marine ciliate  
108 *Tiarina fusus* (13). As *T. fusus* culture used for RNA isolation was fed on *R. lens* (biosample  
109 SAMN02740485), the presence of this sequence in the *T. fusus* transcriptome can be explained by  
110 insufficient starvation of the organisms prior to RNA extraction.

*Rapidly desensitizing cation channelrhodopsins*

111 Fig. S1 shows protein alignment of the opsin domains of BCCRs identified in this study.  
112 Asp85 and Thr89 (bacteriorhodopsin numbering) are conserved in all sequences, whereas Asp96  
113 is replaced with Glu and Thr in *BfCCR2* and *G1CCR*, respectively. However, neither of these  
114 sequences were electrogenic upon expression in mammalian cells (see below), and therefore the  
115 functional importance of these substitutions could not be assessed. In many BCCR homologs the  
116 position of bacteriorhodopsin's Arg82 is occupied by other residues (Lys, Ala, Pro, Gln or even  
117 Glu (in *RaCCR2*)), which is unusual among microbial rhodopsins. Fig. 1A shows a phylogenetic  
118 tree of the transmembrane domains of so far identified BCCRs. The previously characterized  
119 *GtCCR1* and *GtCCR2*, together with *HpCCR*, a closely related sequence from *Hanusia phi*, form  
120 a separate branch of this tree.

121 We synthesized human codon-optimized polynucleotides encoding the opsin domains of  
122 19 newly identified BCCRs, fused them to an in-frame C-terminal EYFP (enhanced yellow  
123 fluorescent protein) tag and expressed in HEK293 (human embryonic kidney) cells. Ten of the  
124 encoded proteins generated photocurrents, the largest of which were the peak currents from  
125 *RaCCR1* and *RsCCR1* (Fig. S2A). The action spectra were determined by measuring the initial  
126 slopes of photocurrent in the linear range of the light intensity. The spectrum of *RaCCR1* closely  
127 matched that of *R1CCR1* (also called ChRmine (13)) and peaked at ~530 nm; that of *RsCCR1*  
128 was ~5 nm blue-shifted (Fig. S2B). The spectral maxima of other tested BCCRs are listed in  
129 Table 1. The current kinetics was very diverse in the tested BCCRs. In particular, currents  
130 recorded from *RaCCR1* and *RsCCR1* exhibited extremely rapid desensitization during  
131 continuous illumination (Fig. 1B, red and blue lines, respectively). Representative photocurrent  
132 traces from other tested BCCRs are shown in Fig. S3.

*Rapidly desensitizing cation channelrhodopsins*

133 To test relative permeability for Na<sup>+</sup>, we partially replaced this ion in the bath with non-  
134 permeable *N*-methyl-D-glucamine (NMG<sup>+</sup>) and determined the reversal potentials (E<sub>rev</sub>) by  
135 measuring the current-voltage relationships in four BCCR variants that generated the largest  
136 photocurrents. *RaCCR1* and *RsCCR1* showed large E<sub>rev</sub> shifts towards the new equilibrium  
137 potential for Na<sup>+</sup> (Fig. S4A), similar to the earlier reported *GtCCR*s (9,10). However, *RaCCR2*  
138 and *RsCCR2* showed smaller shifts, similar to that in *CrChR2* (18). When we reduced the bath  
139 pH without changing its Na<sup>+</sup> concentration, E<sub>rev</sub> shifts were correspondingly smaller in *RaCCR1*  
140 and *RsCCR1*, as compared to *RaCCR2* and *RsCCR2* (Fig. S4B), indicating a higher Na<sup>+</sup>/H<sup>+</sup>  
141 permeability ratio of the former two CCRs, as compared to the latter. No change in E<sub>rev</sub> was  
142 detected upon partial replacement of Cl<sup>-</sup> in the bath with bulky aspartate, indicating that neither  
143 of the tested BCCRs conducted Cl<sup>-</sup> (Fig. S4C).

144 *Absorption spectroscopy of RaCCR1 and RsCCR1*

145 To gain more insight into mechanisms of their photoactivation, we expressed and  
146 detergent-purified *RaCCR1* and *RsCCR1* from the methylotrophic yeast *Pichia pastoris*. Their  
147 absorption spectra in the visible range closely matched the action spectra of photocurrents with  
148 main peaks at 530 and 524 nm, respectively (Fig. 2A). In addition, the absorption spectra of  
149 dark-adapted *RaCCR1* and *RsCCR1* showed structured absorption in the near-UV range (with  
150 peaks at ~307, 321 and 337 nm), in contrast to that of previously characterized *GtCCR2* purified  
151 from the same expression host.

152 Similar UV bands had been reported in *GtCCR4* and tentatively attributed to impurities  
153 of the sample (10). However, incubation of *RaCCR1* and *RsCCR1* with hydroxylamine, an agent  
154 known to cleave the retinal chromophore from the bacteriorhodopsin apoprotein in a light-  
155 dependent manner (19), decreased absorption in the UV region with the difference spectrum

### *Rapidly desensitizing cation channelrhodopsins*

156 exhibiting the same triple-peak structure characteristic of protein-bound retinal (Fig. S5A and B).  
157 In both proteins the rate of hydroxylamine bleaching of the UV bands was at least twice as fast  
158 as that of the main band (Fig. S5C and D), indicating that the UV-absorbing fractions were more  
159 accessible to hydroxylamine than the fractions absorbing in the visible range. Illumination  
160 accelerated bleaching in the visible range, as expected for retinylidene proteins, but did not  
161 influence the rate of bleaching at 321 nm (Fig. S5C and D). These results suggest that the  
162 structured UV absorbance in the dark-adapted sample is attributable to retinal binding to partially  
163 misfolded *RaCCR1* and *RsCCR1*. The ratio of the UV absorption to the main peak absorption  
164 varied from 0.4 to 1.5 in different preparations, did not depend on the length of the expression  
165 construct, purification procedure, or storage conditions, and may reflect the relative amount of  
166 misfolded protein.

167 Continuous illumination of detergent-purified *RaCCR1* with visible light decreased  
168 absorption at the main band (P530) and led to formation of a product (P330) with structured  
169 absorption in the UV region with three peaks at 318, 330 and 346 nm (Fig. 2B), red-shifted from  
170 those observed in the dark. Dissipation of P330 occurred on the time scale of seconds in parallel  
171 with recovery of the unphotolyzed state P530 (Fig. 2C). The recovery of the unphotolyzed state  
172 was ~3-fold slower in *Pichia* membranes than in detergent-purified protein (Fig. S6A). A very  
173 similar product with structured UV absorption was also formed upon illumination of purified  
174 *RsCCR1* (Fig. S6B), with a rate of dissipation in the dark >2-fold faster than that in *RaCCR1*  
175 (Fig. 2D).

#### 176 *Mechanism of photocurrent desensitization*

177 As described above, photocurrents from *RaCCR1* and *RsCCR1* exhibited rapid  
178 desensitization under continuous light (Fig. 1B). Desensitization was also observed under



*Rapidly desensitizing cation channelrhodopsins*

179 stimulation with 6-ns laser flashes at 0.1 Hz frequency even at 10% power (Fig. S6C), which  
180 argues against its origin from a secondary photochemical process. An alternative explanation for  
181 photocurrent desensitization is the existence of a long-lived non-conductive state in the single-  
182 turnover photocycle. To determine the rate of peak current recovery, a second flash was applied  
183 after a variable time delay. The rate of restoration of the ability to generate electric current  
184 closely matched that of P330 dissipation in both purified proteins (Fig. 2D), strongly suggesting  
185 that accumulation of P330 is responsible for the rapid desensitization of photocurrents generated  
186 by *RaCCR1* and *RsCCR1*.

187 Fig. S7A shows a series of photocurrent traces generated by *RaCCR1* in response to 1-s  
188 light pulses of different intensities. The peak photocurrent increased over the entire tested  
189 intensity range, whereas the degree of desensitization reached saturation two orders of magnitude  
190 earlier (Fig. S7B), and similar results were obtained with *RsCCR1* (Fig. S7C). These  
191 observations show that the long-lived non-conductive P330 is not in equilibrium with the  
192 unphotolyzed state of the protein.

193 Alkalization caused formation of a UV-absorbing species of *RaCCR1* with a structured  
194 spectrum closely matching that of the form obtained by illumination (Fig. 3A). The  $pK_a$  of this  
195 process was identical to that of decrease of absorbance at 530 nm, which showed that the UV-  
196 absorbing species was produced from P530 (Fig. 3B). The alkali-induced conversion of the  
197 unphotolyzed form absorbing at 530 nm to P330 decreased the amplitude of the photo-induced  
198 conversion. When illuminated *RaCCR1* samples were incubated in the dark at high pH, only a  
199 small decrease in absorbance at 330 nm was observed, as compared to neutral pH conditions  
200 (Fig. 3C). The  $pK_a$  of this decrease in amplitude was identical to that of conversion of P530 to  
201 the UV-absorbing species (Fig. 3D). We conclude from these observations that the same species

### *Rapidly desensitizing cation channelrhodopsins*

202 accumulated at high pH as that obtained by illumination (i.e. P330). To the best of our  
203 knowledge, P330 is the shortest wavelength intermediate observed in the photocycle of any  
204 microbial rhodopsin. In addition to formation of P330, alkalization caused accumulation of an  
205 M-like intermediate absorbing at  $\sim 390$  nm with  $pK_a \sim 9.0$ , although its concentration (assuming  
206  $\sim$ equal extinction coefficients) was 10-fold smaller than that of P330 (Fig. 3E).

207         At pH 10 essentially all molecules were converted from the unphotolysed form to P330.  
208 This allowed us to use FT-Raman spectroscopy to probe its chromophore structure in the dark.  
209 The Raman spectra measured at pH 7.2 and 10 and their difference spectrum are shown in Fig.  
210 3F. The main ethylenic C=C stretch at  $1530\text{ cm}^{-1}$ , which corresponds to the main visible peak at  
211 530 nm (20), and the fingerprint C-C stretches at 1200 and  $1163\text{ cm}^{-1}$  showed that at pH 7.2  
212 retinal was predominantly in an all-*trans* configuration. Upon alkalization the band at  $1530\text{ cm}^{-1}$   
213 was strongly reduced, and new bands appeared at  $1590\text{ cm}^{-1}$  and  $1562\text{ cm}^{-1}$  which presumably  
214 corresponded, respectively, to P330 and the M-like intermediate absorbing at  $\sim 390$  nm. The  
215 same two bands were clearly resolved in the difference spectrum.

### 216 *Fast photochemical conversions*

217         Fast photochemical conversions in the near UV and visible range were analyzed by flash  
218 photolysis. Fig. S8A shows a series of absorption changes in *RsCCR1* detected at wavelengths  
219 from 390 to 570 nm at 10-nm increments. Only negligible (less than 0.5 mOD) oppositely  
220 directed components with the time constant ( $\tau$ ) values  $\sim 60$ -100  $\mu\text{s}$  were observed at the  
221 wavelengths at which maximal absorption of the red-shifted K and blue-shifted L intermediates  
222 are expected (480 and 560 nm, respectively) (Fig. S8B). Therefore we could not follow the K to  
223 L transition, which occurred on a much faster time scale. To obtain the spectral changes due to L  
224 formation, we plotted the mean absorption changes in the time window between 50 and 100  $\mu\text{s}$

*Rapidly desensitizing cation channelrhodopsins*

225 after the flash against wavelength (Fig. 4A). The maximum of the L intermediate in this  
226 difference spectrum was at ~460 nm.

227 The spectral characteristics of the later transitions were obtained by global fit analysis.  
228 The appearance of a typical M intermediate with the absorption maximum at ~390 nm (the  
229 positive peak in Fig. 4B) was observed within 1 ms. After that, biphasic bleaching at all visible  
230 wavelengths took place, which was obviously related to generation of P330 form. Fast bleaching  
231 with  $\tau \sim 4.5$  ms reflected the decay of the bulk of the initial form and may involve the appearance  
232 of a blue-absorbing (N?) intermediate (Fig. 4C), which was more obvious during the slow  
233 bleaching with  $\tau \sim 40$  ms (Fig. 4D). The recovery of the initial state proceeded in two steps with  $\tau$   
234 1.4 and 3.8 s. At least the fast recovery involved depletion of a blue-absorbing intermediate (Fig.  
235 4E). The  $\tau$  of the main slow recovery component was equal to those of P330 dissipation and  
236 restoration of electrical sensitivity (Fig. 4F and Fig. 2D). Qualitatively similar phototransitions  
237 were observed in the second pigment *RaCCR1* with time constants of components 0.3, 6, 40,  
238 3200 and 1140 ms (Fig. S9). In agreement with slower dissipation of the P330 intermediate and  
239 restoration of light sensitivity in this pigment as compared to *RsCCR1* (Fig. 2D), the recovery in  
240 the visible range was also slower, and depletion of the blue absorbing form was also observed  
241 (Fig. S9E and F). However, the 40-ms component which in *RsCCR1* corresponded to slow  
242 bleaching, in *RaCCR1* revealed fast recovery.

243 We recorded photocurrents in HEK cells upon 6-ns laser flash excitation at 532 nm as in  
244 flash-photolysis measurements for kinetic comparison with absorption changes in purified  
245 proteins. Channel opening and closing in *RaCCR1* and *RsCCR1* took place in the same time  
246 windows as absorption changes at the wavelengths of M-intermediate absorption in which proton  
247 transfers occur (Fig. 5A and B).

### *Rapidly desensitizing cation channelrhodopsins*

248 In the current traces generated by *GtCCR1* and *GtCCR2*, a large peak was observed in  
249 the 30-100  $\mu$ s time domain prior to channel opening (9). This peak, also exhibited by some low-  
250 efficiency CCRs from green algae, reflects intramolecular transfer of the Schiff base proton to an  
251 outwardly located acceptor, integrated by the measuring system (21). This component could also  
252 be resolved in the current traces from *RaCCR1* and *RsCCR1* recorded at the voltages near the  
253 reversal potential for  $\text{Na}^+$ , but it was  $\sim$ 100-fold smaller than that in *GtCCR1* and *GtCCR2* (Fig.  
254 S10).

### 255 *Mutagenesis analysis*

256 In *GtCCR1* and *GtCCR2* we found that a neutralizing mutation of the Asp96 homolog  
257 (Asp98) completely suppressed channel activity, so that only intramolecular transfer of the  
258 Schiff base proton could be detected (9). The corresponding D125N and D128N mutations in  
259 *RaCCR1* and *RsCCR1*, respectively, did not eliminate channel currents (Fig. 6A). Neutralization  
260 of the Asp85 homolog in *RaCCR1* (the D114N mutation) reduced expression of the construct, as  
261 judged by the tag fluorescence, and no photocurrents above the noise level could be detected.  
262 Replacement of Cys119 (corresponding to Thr90 in bacteriorhodopsin) with Ala completely  
263 abolished photocurrents in *RaCCR1*, as did also the corresponding mutations in *RaCCR2*,  
264 *GtCCR2* and *PsuCCR*. In the *RaCCR1\_C119T* mutant the photocurrent amplitude was greatly  
265 reduced (the mean peak current in response to a first light pulse of maximal intensity was  $10 \pm 3$   
266 pA,  $n = 14$  cells). These tiny currents, however, exhibited only  $\sim$ 40% desensitization during 1-s  
267 continuous illumination (Fig. 6B), i.e., much less than in the wild type. The photocurrent decay  
268 after switching the light off was biphasic, with the slow phase on the second time scale. But the  
269 most striking difference of this mutant from the wild type was the absence of the long-living UV-  
270 absorbing form with the structured spectrum corresponding to P330 in the wild type (Fig. 6C).

*Rapidly desensitizing cation channelrhodopsins*

271 Instead, a smooth peak with the maximum at 380 nm (the M state) was produced. The dissipation  
272 of this state and the recovery of the unphotolyzed state with the peak absorbance at 506 nm were  
273 very slow (Fig. 6D).

274 DISCUSSION

275 Our results show that BCCRs are widely spread among cryptophyte algae and form three  
276 branches (subfamilies) of a phylogenetic tree. BCCRs exhibit diverse current kinetics, spectral  
277 sensitivity and Na<sup>+</sup>/H<sup>+</sup> permeability ratios, as has also been found in other channelrhodopsin  
278 families. Two representatives of the currently studied BCCRs differ in their mechanism of  
279 photoactivation from previously described *GtCCR1* and 2, which belong to a different subfamily  
280 of cryptophyte CCRs. Most notably, a particular proton transfer essential to trigger channel  
281 opening in the earlier reported subfamily is not required in the subfamily described in this study.  
282 Photocurrents by *RaCCR1* and *RsCCR1* exhibit very rapid desensitization under continuous  
283 illumination, which we show is related to the formation of a long-living UV-absorbing  
284 intermediate in their photocycles. Similar rapid photocurrent desensitization was observed in  
285 anion-conducting MerMAIDs, explained by accumulation of a long-lived M intermediate with an  
286 unusual short-wavelength maximum absorption peak at 364 nm (7). In both *RaCCR1* and  
287 *RsCCR1* two distinct UV-absorbing intermediates were accumulated upon illumination, one at  
288 390 nm, typical of M intermediates, and the other a triple-peaked species with a uniquely far  
289 blue-shifted spectrum with a 330-nm maximum.

290 Flash photolysis measurements revealed an extremely fast (<1 μs after the flash)  
291 appearance of the L intermediate that might be in equilibrium with K during the first 100 μs in  
292 *RaCCR1* and *RsCCR1*. The typical M intermediate absorbing at 390 nm was formed during 0.1-  
293 1 ms. We could not follow the appearance of the second blue-shifted intermediate (P330)

*Rapidly desensitizing cation channelrhodopsins*

294 because the low signal-to-noise ratio in the near UV range limited measurements to wavelengths  
295  $\geq 380$  nm. However, we observed bleaching in the entire visible range on the millisecond time  
296 scale, which likely indicated accumulation of P330. A decrease of absorption in the blue range  
297 was observed during the fast recovery of the unphotolyzed states of both *RaCCR1* and *RsCCR1*.  
298 This most probably reflects dissipation of an N-like intermediate that appears earlier in the  
299 photocycle.

300 The short-wavelength absorption of photointermediate P330 is unique among  
301 photocycles of microbial rhodopsins. The extremely short wavelength absorption and very high  
302 ethylenic stretch wavenumber of a corresponding band in Raman spectra suggest an extremely  
303 hydrophobic environment of the retinal moiety. The chromophore in P330 could be, for example,  
304 retro-retinal, a derivative in which all double bonds are shifted towards the ring by one position  
305 (22), or a free retinal that remains in the binding pocket (23). A linear photocycle involving P330  
306 is the simplest scheme that fits our results; however, we cannot exclude a branched photocycle as  
307 was proposed for the *CrChR2\_C128T* mutant (22).

308 Rapid desensitization observed in *RaCCR1* and *RsCCR1* under continuous illumination  
309 would potentially allow temporally precise neuronal activation even in the presence of light that  
310 can be used for fluorescent imaging. Additional advantages of these two BCCRs are their  
311 relatively red-shifted absorption and high  $\text{Na}^+/\text{H}^+$  permeability ratio. Better understanding of  
312 their molecular mechanisms will facilitate their rational design for optogenetic needs.

313 MATERIALS AND METHODS

314 *Bioinformatics*

*Rapidly desensitizing cation channelrhodopsins*

315 BCCR homologs were identified by searching cryptophyte transcriptomes from the  
316 MMETS sequencing project (15) and 1KP project (16) using probabilistic inference methods  
317 based on profile hidden Markov models (profile HMMs). Profile HMMs were built from  
318 previously known BCCR sequences using HMMER software (version 3.1b2; (14)) with default  
319 parameters and refined upon functional testing of the homologs by patch clamping. Search  
320 procedures were automated with Python 2.7 and the Biopython module (24). The protein  
321 sequence alignment was created using MUSCLE algorithm implemented in DNASTAR  
322 Lasergene (Madison, WI) MegAlign Pro software. The phylogenetic tree was visualized using  
323 Dendroscope software (25).

324 *Molecular biology*

325 For expression in HEK293 cells, DNA polynucleotides encoding the BCCR opsin  
326 domains optimized for human codon usage were synthesized (GenScript, Piscataway, NJ) and  
327 cloned into the mammalian expression vector pcDNA3.1 (Life Technologies, Grand Island, NY)  
328 in frame with an EYFP tag. For expression in *Pichia*, the opsin-encoding constructs were fused  
329 in frame with a C-terminal eight-His tag and subcloned into the pPIC9K vector (Invitrogen).  
330 Mutants were generated with Quikchange XL kit (Agilent Technologies, Santa Clara, CA) and  
331 verified by sequencing.

332 *HEK293 transfection and patch clamp recording*

333 HEK293 cells were transfected using the ScreenFectA transfection reagent (Waco  
334 Chemicals USA, Richmond, VA). All-*trans*-retinal (Sigma) was added at the final concentration  
335 of 3  $\mu$ M immediately after transfection. Photocurrents were recorded 48-96 h after transfection  
336 in the whole-cell voltage clamp mode with an Axopatch 200B amplifier (Molecular Devices,

*Rapidly desensitizing cation channelrhodopsins*

337 Union City, CA) using the 10 kHz low-pass Bessel filter. The signals were digitized with a  
338 Digidata 1440A using pClamp 10 software (both from Molecular Devices). Patch pipettes with  
339 resistances of 2-4 M $\Omega$  were fabricated from borosilicate glass. The standard pipette solution  
340 contained (in mM): KCl 126, MgCl<sub>2</sub> 2, CaCl<sub>2</sub> 0.5, Na-EGTA 5, HEPES 25, pH 7.4. The standard  
341 bath solution contained (in mM): NaCl 150, CaCl<sub>2</sub> 1.8, MgCl<sub>2</sub> 1, glucose 5, HEPES 10, pH 7.4.  
342 A 4 M KCl bridge was used in all experiments, and possible diffusion of Cl<sup>-</sup> from the bridge to  
343 the bath was minimized by frequent replacement of the bath solution with fresh buffer. For  
344 measurements of the reversal potential shifts under varied ionic conditions, Na<sup>+</sup> was substituted  
345 for K<sup>+</sup> in the pipette solution to minimize the number of ionic species in the system. To reduce  
346 the Cl<sup>-</sup> concentration in the bath, NaCl was replaced with Na-aspartate; to reduce the Na<sup>+</sup>  
347 concentration, with N-methyl-D-glucamine chloride; to increase the H<sup>+</sup> concentration, pH was  
348 adjusted with H<sub>2</sub>SO<sub>4</sub>. The holding voltages were corrected for liquid junction potentials  
349 calculated using the Clampex built-in LJP calculator (26). Continuous light pulses were provided  
350 by a Polychrome V light source (T.I.L.L. Photonics GMBH, Grafelfing, Germany) in  
351 combination with a mechanical shutter (Uniblitz Model LS6, Vincent Associates, Rochester,  
352 NY; half-opening time 0.5 ms). The maximal quantum density at the focal plane of the 40 $\times$   
353 objective was 7.7 mW mm<sup>-2</sup> at 515 nm. The action spectra were constructed by calculation of the  
354 initial slope of photocurrent and corrected for the quantum density measured at each wavelength.  
355 Laser excitation was provided by a Minilite Nd:YAG laser (532 nm, pulsewidth 6 ns, energy 12  
356 mJ; Continuum, San Jose, CA). The current traces were logarithmically filtered using a custom  
357 software, and the laser artifact was digitally subtracted. Curve fitting was performed by Origin  
358 Pro software (OriginLab Corporation, Northampton, MA).

359 *Expression and purification of BCCRs from Pichia*



*Rapidly desensitizing cation channelrhodopsins*

360 The plasmids encoding BCCRs were linearized with SallI and used to transform *P.*  
361 *pastoris* strain SMD1168 (*his4*, *pep4*) by electroporation. Transformants were first screened for  
362 their ability to grow on histidine-deficient medium, and second, for their geneticin resistance.  
363 Single colonies that grew on 4 mg/ml geneticin were screened by small-scale cultivation, and  
364 clones of the brightest color were selected. For protein purification, a starter culture was  
365 inoculated into buffered complex glycerol medium until A600 reached 4–8, after which the cells  
366 were harvested by centrifugation at 5000 rpm and transferred to buffered complex methanol  
367 medium supplemented with 5  $\mu$ M all-*trans* retinal (Sigma Aldrich). Expression was induced by  
368 the addition of 0.5% methanol. After 24–30 h, the cells were harvested and disrupted in a bead  
369 beater (BioSpec Products, Bartlesville, OK) in buffer A (20 mM sodium phosphate, pH 7.4, 100  
370 mM NaCl, 1 mM EDTA, 5% glycerol). After removing cell debris by low-speed centrifugation,  
371 membrane fragments were collected by ultracentrifugation at 40,000 rpm in a Ti45 rotor,  
372 resuspended in buffer B (20 mM Hepes, pH 7.4, 300 mM NaCl, 5% glycerol) and solubilized by  
373 incubation with 1.5% dodecyl maltoside (DDM) for 1.5 h or overnight at 4°C. Non-solubilized  
374 material was removed by ultracentrifugation at 50,000 rpm in a TLA-100 rotor. The supernatant  
375 was mixed with nickel-nitrilotriacetic acid agarose beads (Qiagen, Hilden, Germany) and loaded  
376 on a column. The proteins were eluted with buffer C (20 mM Hepes, pH 7.4, 300 mM NaCl, 5%  
377 glycerol, 0.02% DDM) containing 300 mM imidazole. The pigments were concentrated and  
378 imidazole was removed by repetitive washing with imidazole-free buffer C using YM-10  
379 centrifugal filters (Amicon, Billerica, MA).

380 *Absorption spectroscopy and flash photolysis*

381 Absorption spectra of purified BCCRs were recorded using a Cary 4000  
382 spectrophotometer (Varian, Palo Alto, CA). The pK<sub>a</sub> was determined by fitting the classical

### *Rapidly desensitizing cation channelrhodopsins*

383 Henderson-Hasselbalch equation in the form  $y = A/(1+10E(pK_a-pH))$  to experimental data.  
384 Light-induced absorption changes were measured with a laboratory-constructed crossbeam  
385 apparatus. Excitation flashes (532 nm, 6 ns, 40 mJ) were provided by a Surelite I Nd-YAG laser  
386 (Continuum, Santa Clara, CA). Measuring light was from a 250-W incandescent tungsten lamp  
387 combined with a McPherson monochromator (model 272, Acton, MA). Absorption changes were  
388 detected with a Hamamatsu Photonics (Bridgewater, NJ) photomultiplier tube (model R928),  
389 protected from excitation laser flashes by a second monochromator of the same type. Signals  
390 were amplified by a low noise current amplifier (model SR445A; Stanford Research Systems,  
391 Sunnyvale, CA) and digitized with a GaGe Octopus digitizer board (model CS8327,  
392 DynamicSignals LLC, Lockport, IL), maximum sampling rate 50 MHz. Logarithmic filtration of  
393 the data was performed using the GageCon program (27).

### 394 *Fourier-transformed Raman spectroscopy*

395 Fourier-transformed Raman spectra were collected in 5  $\mu$ l of a concentrated detergent-  
396 solubilized protein in pH-adjusted elution buffer placed in a metallic holder and covered by  
397 adhesive tape. The scattering was recorded in 180° backscattering geometry, using FRA106/s  
398 accessory to the Bruker IFS66vs spectrometer, with Nd-YAG laser excitation provided at 1064  
399 nm, at a 2  $\text{cm}^{-1}$  resolution, controlled by the OPUS software. At least 10000 scans averaged per  
400 sample. Raman spectra of the buffers were taken separately in the same geometry and subtracted  
401 to get pure protein spectra.

### 402 *Statistics*

403 Descriptive statistics was used as implemented in Origin software. The data are presented  
404 as mean  $\pm$  s.e.m. values; the data from individual replicates are also shown when appropriate.

*Rapidly desensitizing cation channelrhodopsins*

405 The sample size was estimated from previous experience and published work on similar subjects,  
406 as recommended by the NIH guidelines (28).

407 *Data availability*

408 The polynucleotide sequences of BCCR homologs reported in this study have been  
409 deposited to GenBank (accession numbers MN585290-MN585308).

410 **Acknowledgements**

411 We thank Olivier Morelle for technical assistance with bioinformatics analysis. This  
412 work was supported by National Institutes of Health Grant R01GM027750, the Hermann Eye  
413 Fund, and Endowed Chair AU-0009 from the Robert A. Welch Foundation to J.L.S, and by the  
414 Natural Sciences and Engineering Research Council of Canada (NSERC) Discovery Grant  
415 RGPIN-2018-04397 to L.S.B. The content is solely the responsibility of the authors and does not  
416 necessarily represent the official views of the National Institutes of Health.

417 **Conflict of interest**

418 The authors declare that they have no conflicts of interest with the contents of this article.

419 **REFERENCES**

- 420 1. Sineshchekov, O. A., Jung, K.-H., and Spudich, J. L. (2002) Two rhodopsins mediate  
421 phototaxis to low- and high-intensity light in *Chlamydomonas reinhardtii*. *Proc. Natl.*  
422 *Acad. Sci. USA* 99, 8689-8694
- 423 2. Nagel, G., Ollig, D., Fuhrmann, M., Kateriya, S., Musti, A. M., Bamberg, E., and  
424 Hegemann, P. (2002) Channelrhodopsin-1: a light-gated proton channel in green algae.  
425 *Science* 296, 2395-2398

*Rapidly desensitizing cation channelrhodopsins*

- 426 3. Nagel, G., Szellas, T., Huhn, W., Kateriya, S., Adeishvili, N., Berthold, P., Ollig, D.,  
427 Hegemann, P., and Bamberg, E. (2003) Channelrhodopsin-2, a directly light-gated  
428 cation-selective membrane channel. *Proc. Natl. Acad. Sci. USA* 100, 13940-13945
- 429 4. Deisseroth, K. (2011) Optogenetics. *Nat. Methods* 8, 26-29
- 430 5. Vazquez-Dominguez, I., Garanto, A., and Collin, R. W. J. (2019) Molecular therapies for  
431 inherited retinal diseases - Current standing, opportunities and challenges. *Genes (Basel)*  
432 10
- 433 6. Govorunova, E. G., Sineshchekov, O. A., Liu, X., Janz, R., and Spudich, J. L. (2015)  
434 Natural light-gated anion channels: A family of microbial rhodopsins for advanced  
435 optogenetics. *Science* 349, 647-650
- 436 7. Oppermann, J., Fischer, P., Silapetere, A., Liepe, B., Rodriguez-Rozada, S., Flores-Uribe,  
437 J., Peter, E., Keidel, A., Vierock, J., Kaufmann, J., Broser, M., Luck, M., Bartl, F.,  
438 Hildebrandt, P., Simon Wiegert, J., Beja, O., Hegemann, P., and Wietek, J. (2019)  
439 MerMAIDs: a family of metagenomically discovered marine anion-conducting and  
440 intensely desensitizing channelrhodopsins. *Nat. Commun.* 10, 3315
- 441 8. Govorunova, E. G., Sineshchekov, O. A., and Spudich, J. L. (2016) Structurally distinct  
442 cation channelrhodopsins from cryptophyte algae. *Biophys. J.* 110, 2302-2304
- 443 9. Sineshchekov, O. A., Govorunova, E. G., Li, H., and Spudich, J. L. (2017)  
444 Bacteriorhodopsin-like channelrhodopsins: Alternative mechanism for control of cation  
445 conductance. *Proc. Natl. Acad. Sci. USA* 114, E9512-E9519
- 446 10. Yamauchi, Y., Konno, M., Ito, S., Tsunoda, S. P., Inoue, K., and Kandori, H. (2017)  
447 Molecular properties of a DTD channelrhodopsin from *Guillardia theta*. *Biophys.*  
448 *Physicobiol.* 14, 57-66

*Rapidly desensitizing cation channelrhodopsins*

- 449 11. Shigemura, S., Hososhima, S., Kandori, H., and Tsunoda, S. P. (2019) Ion channel  
450 properties of a cation channelrhodopsin, Gt\_CCR4. *Appl. Sci.* 9, 3440
- 451 12. Wietek, J., and Prigge, M. (2016) Enhancing channelrhodopsins: An overview. *Methods*  
452 *Mol. Biol.* 1408, 141-165
- 453 13. Marshel, J. H., Kim, Y. S., Machado, T. A., Quirin, S., Benson, B., Kadmon, J., Raja, C.,  
454 Chibukhchyan, A., Ramakrishnan, C., Inoue, M., Shane, J. C., McKnight, D. J.,  
455 Yoshizawa, S., Kato, H. E., Ganguli, S., and Deisseroth, K. (2019) Cortical layer-specific  
456 critical dynamics triggering perception. *Science*
- 457 14. Eddy, S. R. (2011) Accelerated profile HMM searches. *PLoS Comput. Biol.* 7, e1002195
- 458 15. Keeling, P. J., Burki, F., Wilcox, H. M., Allam, B., Allen, E. E., Amaral-Zettler, L. A.,  
459 Armbrust, E. V., Archibald, J. M., Bharti, A. K., Bell, C. J., Beszteri, B., Bidle, K. D.,  
460 Cameron, C. T., Campbell, L., Caron, D. A., Cattolico, R. A., Collier, J. L., Coyne, K.,  
461 Davy, S. K., Deschamps, P., Dyrman, S. T., Edvardsen, B., Gates, R. D., Gobler, C. J.,  
462 Greenwood, S. J., Guida, S. M., Jacobi, J. L., Jakobsen, K. S., James, E. R., Jenkins, B.,  
463 John, U., Johnson, M. D., Juhl, A. R., Kamp, A., Katz, L. A., Kiene, R., Kudryavtsev, A.,  
464 Leander, B. S., Lin, S., Lovejoy, C., Lynn, D., Marchetti, A., McManus, G., Nedelcu, A.  
465 M., Menden-Deuer, S., Miceli, C., Mock, T., Montresor, M., Moran, M. A., Murray, S.,  
466 Nadathur, G., Nagai, S., Ngam, P. B., Palenik, B., Pawlowski, J., Petroni, G., Piganeau,  
467 G., Posewitz, M. C., Rengefors, K., Romano, G., Rumpho, M. E., Rynearson, T.,  
468 Schilling, K. B., Schroeder, D. C., Simpson, A. G., Slamovits, C. H., Smith, D. R., Smith,  
469 G. J., Smith, S. R., Sosik, H. M., Stief, P., Theriot, E., Twary, S. N., Umale, P. E., Vaultot,  
470 D., Wawrik, B., Wheeler, G. L., Wilson, W. H., Xu, Y., Zingone, A., and Worden, A. Z.  
471 (2014) The Marine Microbial Eukaryote Transcriptome Sequencing Project (MMETSP):

*Rapidly desensitizing cation channelrhodopsins*

- 472 illuminating the functional diversity of eukaryotic life in the oceans through  
473 transcriptome sequencing. *PLoS Biol.* 12, e1001889
- 474 16. Matasci, N., Hung, L. H., Yan, Z., Carpenter, E. J., Wickett, N. J., Mirarab, S., Nguyen,  
475 N., Warnow, T., Ayyampalayam, S., Barker, M., Burleigh, J. G., Gitzendanner, M. A.,  
476 Wafula, E., Der, J. P., dePamphilis, C. W., Roure, B., Philippe, H., Ruhfel, B. R., Miles,  
477 N. W., Graham, S. W., Mathews, S., Surek, B., Melkonian, M., Soltis, D. E., Soltis, P. S.,  
478 Rothfels, C., Pokorny, L., Shaw, J. A., DeGironimo, L., Stevenson, D. W., Villarreal, J.,  
479 C., Chen, T., Kutchan, T. M., Rolf, M., Baucom, R. S., Deyholos, M. K., Samudrala, R.,  
480 Tian, Z., Wu, X., Sun, X., Zhang, Y., Wang, J., Leebens-Mack, J., and Wong, G. K.  
481 (2014) Data access for the 1,000 Plants (1KP) project. *Gigascience* 3, 17
- 482 17. Daugbjerg, N., Norlin, A., and Lovejoy, C. (2018) *Baffinella frigidus* gen. et sp. nov.  
483 (*Baffinellaceae* fam. nov., *Cryptophyceae*) from Baffin Bay: Morphology, pigment  
484 profile, phylogeny, and growth rate response to three abiotic factors. *J. Phycol.* 54, 665-  
485 680
- 486 18. Govorunova, E. G., Sineshchekov, O. A., Li, H., Janz, R., and Spudich, J. L. (2013)  
487 Characterization of a highly efficient blue-shifted channelrhodopsin from the marine alga  
488 *Platymonas subcordiformis*. *J. Biol. Chem.* 288, 29911-29922
- 489 19. Oesterhelt, D., Gruber, H., and Schuhmann, L. (1974) Light-dependent reaction of  
490 bacteriorhodopsin with hydroxylamine in cell suspensions of *Halobacterium halobium*:  
491 demonstration of an apomembrane. *FEBS Lett.* 44
- 492 20. Kakitani, H., Kakitani, T., Rodman, H., Honig, B., and Callender, R. (1983) Correlation  
493 of vibrational frequencies with absorption maxima in polyenes, rhodopsin,  
494 bacteriorhodopsin, and retinal analogs. *J. Phys. Chem.* 87, 3620-3628

*Rapidly desensitizing cation channelrhodopsins*

- 495 21. Sineshchekov, O. A., Govorunova, E. G., Wang, J., Li, H., and Spudich, J. L. (2013)  
496 Intramolecular proton transfer in channelrhodopsins. *Biophys. J.* 104, 807-817
- 497 22. Stehfest, K., Ritter, E., Berndt, A., Bartl, F., and Hegemann, P. (2010) The branched  
498 photocycle of the slow-cycling channelrhodopsin-2 mutant C128T. *J. Mol. Biol.* 398,  
499 690-702
- 500 23. Bruun, S., Naumann, H., Kuhlmann, U., Schulz, C., Stehfest, K., Hegemann, P., and  
501 Hildebrandt, P. (2011) The chromophore structure of the long-lived intermediate of the  
502 C128T channelrhodopsin-2 variant. *FEBS Lett.*
- 503 24. Cock, P. J., Antao, T., Chang, J. T., Chapman, B. A., Cox, C. J., Dalke, A., Friedberg, I.,  
504 Hamelryck, T., Kauff, F., Wilczynski, B., and de Hoon, M. J. (2009) Biopython: freely  
505 available Python tools for computational molecular biology and bioinformatics.  
506 *Bioinformatics* 25, 1422-1423
- 507 25. Huson, D. H., and Scornavacca, C. (2012) Dendroscope 3: an interactive tool for rooted  
508 phylogenetic trees and networks. *Syst. Biol.* 61, 1061-1067
- 509 26. Barry, P. H. (1994) JPCalc, a software package for calculating liquid junction potential  
510 corrections in patch-clamp, intracellular, epithelial and bilayer measurements and for  
511 correcting junction potential measurements. *J. Neurosci. Methods* 51, 107-116
- 512 27. Waschuk, S. A., Bezerra, A. G. J., Shi, L., and Brown, L. S. (2005) Leptosphaeria  
513 rhodopsin: Bacteriorhodopsin-like proton pump from a eukaryote. *Proc. Natl. Acad. Sci.*  
514 *USA* 102, 6879-6883
- 515 28. Dell, R. B., Holleran, S., and Ramakrishnan, R. (2002) Sample size determination. *ILAR*  
516 *J.* 43, 207-213

517 FIGURE LEGENDS

*Rapidly desensitizing cation channelrhodopsins*

518 **Figure 1.** (A) A phylogenetic tree of BCCR transmembrane domains. Bold font shows the  
519 proteins that generated photocurrents upon expression in mammalian cells. (B) Normalized  
520 photocurrent traces from *RaCCR1* and *RsCCR1* (colored lines) recorded at -60 mV in response  
521 to a light pulse, duration of which is shown as the bar on top. Traces from previously  
522 characterized *GtCCR1* and *GtCCR2* (black lines) are shown for comparison.

523 **Figure 2.** (A) The absorption spectra of dark-adapted detergent-purified proteins. (B) The  
524 difference (light minus dark) absorption spectrum of *RaCCR1*. (C) The time course of absorption  
525 changes at 330 and 530 nm during dark incubation of illuminated *RaCCR1*. (D) The time course  
526 of absorption changes at 330 nm in *RsCCR1* (that in *RaCCR1* from panel C is shown for  
527 comparison) and photocurrent recovery for both channelrhodopsins.

528 **Figure 3.** (A) The UV region of the difference absorption spectra of *RaCCR1* obtained upon a  
529 pH increase from 7.2 to 9.3 (red, left axis) or upon illumination (black, right axis). (B) The pH  
530 dependence of absorbance changes at 330 nm (black, left axis) and 530 nm (red, right axis). (C)  
531 Absorbance changes at 330 nm during incubation of *RaCCR1* in the dark at the indicated pH.  
532 (D) The pH dependence of the light-induced absorbance changes at 330 nm. (E) The difference  
533 absorption spectrum pH 10 minus pH 7.2. (F) The FT-Raman spectra measured at pH 7.2 and 10,  
534 and their difference spectrum.

535 **Figure 4.** (A) Mean photoinduced absorbance changes recorded from purified *RsCCR1* in the  
536 50-100  $\mu$ s time window. (B-F) Spectral transitions in *RsCCR1* derived by global fit analysis.

537 **Figure 5.** (A and B) Laser flash-evoked photocurrents at -60 mV (red) and photoinduced  
538 absorbance change (blue) recorded from *RaCCR1* (A) and *RsCCR1* (B).



*Rapidly desensitizing cation channelrhodopsins*

539 **Figure 6.** (A) Laser-evoked photocurrents recorded at -60 mV from the mutants of the Asp96  
540 homolog in three BCCR mutants in which the homolog of Asp96 was neutralized. (B) The  
541 current trace recorded in response to 1-s light pulse from the *RaCCR1\_C119T* mutant (red line).  
542 The normalized trace from the wild type is shown in black for comparison. (C) The light minus  
543 dark absorption spectrum of purified *RaCCR1\_C119T* mutant (red). The spectrum for the wild  
544 type is shown in black for comparison. (D) Absorbance changes in purified illuminated  
545 *RaCCR1\_C119T* during incubation in the dark.

546 SUPPLEMENTARY FIGURE LEGENDS

547 **Figure S1.** Protein sequence alignment of the opsin domains of BCCRs first reported in this  
548 study. Residues are color-coded according to their chemical properties.

549 **Figure S2.** (A) Amplitudes of BCCR photocurrents recorded at -60 mV at the amplifier output  
550 upon photostimulation at the peak sensitivity wavelength. Stationary currents were measured at  
551 the end of a 1-s light pulse. The data are the mean values  $\pm$  sem recorded from 3-24 individual  
552 cells. The data from individual cells are shown as empty diamonds. (B) The action spectra of  
553 photocurrents. The data are the mean values  $\pm$  sem recorded from 6-8 individual scans.

554 **Figure S3.** Representative photocurrent traces recorded from indicated BCCRs at -60 mV at the  
555 amplifier output in response to a light pulse, the duration of which is shown as a colored bar on  
556 top.

557 **Figure S4.** (A-C) The reversal potentials measured under indicated ionic conditions. The data  
558 points are the mean values  $\pm$  sem. The data from individual cells are shown as empty diamonds.

*Rapidly desensitizing cation channelrhodopsins*

559 **Figure S5.** (A and B) The difference spectra (treated minus untreated sample) obtained by  
560 incubation of indicated proteins with hydroxylamine (HA) in the dark (black lines) and under  
561 illumination (red lines). (C and D) The time course of hydroxylamine bleaching of the UV and  
562 visible absorption bands. The bar on top shows the time of illumination.

563 **Figure S6.** (A) The rate of absorbance recovery at 530 nm of *RaCCR1* in *Pichia* membranes (red  
564 line) as compared to that in detergent (black line). (B) The UV portion of the *RsCCR1* difference  
565 spectrum (that of *RaCCR1* from Fig. 1B in the main text is shown for comparison). (C) Peak  
566 amplitude of *RaCCR1* photocurrents in response to 0.1 Hz trains of 6-ns laser flashes.

567 **Figure S7.** (A) A series of *RaCCR1* current traces in response to 1-s light pulses of different  
568 intensities. (B and C) The dependence of peak current amplitude and desensitization on the  
569 stimulus intensity in *RaCCR1* (B) and *RsCCR1* (C).

570 **Figure S8.** (A) A series of flash-induced absorption changes recorded at the indicated  
571 wavelengths between 390 and 570 nm in purified *RsCCR1*. (B) Absorption changes at the  
572 wavelengths corresponding to the K and L intermediates in the microsecond range in *RsCCR1*.

573 **Figure S9.** (A) Mean photoinduced absorbance changes recorded from purified *RaCCR1* in the  
574 0-100  $\mu$ s time window. (B-F) Spectral transitions in *RaCCR1* derived by global fit analysis.

575 **Figure S10.** A laser-flash-evoked photocurrent trace recorded from *RaCCR1* (the black dashed  
576 line) at the holding potential near the equilibrium potential for  $\text{Na}^+$ . The red solid line shows a  
577 multiexponential fit.

*Rapidly desensitizing cation channelrhodopsins*

1 **Table 1.** A list of BCCR homologs tested in this study (functional homologs are in bold font).

|           | <b>Accession number</b> | <b>Abbreviated protein name</b> | <b>Source organism</b>                    | <b>Transcript number</b>        | <b>Spectral peak (nm)</b> |
|-----------|-------------------------|---------------------------------|-------------------------------------------|---------------------------------|---------------------------|
| <b>1</b>  | <b>MN585290</b>         | <b><i>BfCCR1</i></b>            | <i>Baffinella</i>                         | <b>0987_20121128_7073*</b>      | <b>500</b>                |
| 2         | MN585291                | <i>BfCCR2</i>                   | <i>frigidus</i> (CCMP 2293)               | 0987_20121128_39196*            | N/A                       |
| 3         | MN585292                | <i>GcCCR1</i>                   | <i>Geminigera</i>                         | 0799_20121207_13742*            | N/A                       |
| <b>4</b>  | <b>MN585293</b>         | <b><i>GcCCR2</i></b>            | <i>cryophila</i> (CCMP 2564)              | <b>0799_20121207_42824*</b>     | <b>460</b>                |
| 5         | MN585294                | <i>GICCR</i>                    | <i>Geminigera</i> sp. (Caron Lab isolate) | 1102_20130122_14880*            | N/A                       |
| <b>6</b>  | <b>MN585295</b>         | <b><i>HpCCR</i></b>             | <i>Hanusia phi</i> (CCMP 325)             | <b>1048_20121227_6498*</b>      | <b>500</b>                |
| 7         | MN585296                | <i>HrCCR</i>                    | <i>Hemiselmis rufescens</i> (PCC 563)     | 1357_20121228_3699*             | N/A                       |
| <b>8</b>  | <b>MN585298</b>         | <b><i>PsuCCR2</i></b>           | <i>Proteomonas</i>                        | <b>IRZA_2004242<sup>#</sup></b> | <b>480</b>                |
| 9         | MN585297                | <i>PsuCCR3</i>                  | <i>sulcata</i> (CCMP 704)                 | IRZA_2061044 <sup>#</sup>       | N/A                       |
| 10        | MN585299                | <i>PsuCCR4</i>                  |                                           | IRZA_2001844 <sup>#</sup>       | N/A                       |
| <b>11</b> | <b>MN585300</b>         | <b><i>RaCCR1</i></b>            | <i>Rhodomonas</i>                         | <b>1101_20121128_4039*</b>      | <b>530</b>                |

*Rapidly desensitizing cation channelrhodopsins*

|           |                 |                      |                           |                               |            |
|-----------|-----------------|----------------------|---------------------------|-------------------------------|------------|
| <b>12</b> | <b>MN585303</b> | <b><i>RaCCR2</i></b> | <i>abbreviata</i>         | <b>1101_20121128_2696*</b>    | <b>470</b> |
| <b>13</b> | <b>MN585301</b> | <b><i>RaCCR3</i></b> | (Caron Lab                | <b>1101_20121128_32053*</b>   | <b>520</b> |
| 14        | MN585302        | <i>RaCCR4</i>        | isolate)                  | 1101_20121128_22530*          | N/A        |
| <b>15</b> | <b>MN585304</b> | <b><i>RlCCR1</i></b> | <i>Rhodomonas</i>         | <b>0484_2_20121128_11058*</b> | <b>520</b> |
| 16        | MN585305        | <i>RlCCR2</i>        | <i>lens</i> (CCMP<br>739) | 0484_2_20121128_23336*        | N/A        |
| <b>17</b> | <b>MN585307</b> | <b><i>RsCCR1</i></b> | <i>Rhodomonas</i>         | <b>1047_20130122_18677*</b>   | <b>524</b> |
| <b>18</b> | <b>MN585308</b> | <b><i>RsCCR2</i></b> | <i>salina</i> (CCMP       | <b>1047_20130122_17846*</b>   | <b>470</b> |
| 19        | MN585306        | <i>RsCCR3</i>        | 1319)                     | 1047_20130122_11358*          | N/A        |

2 \*Transcripts from the MMETS project.

3 #Transcripts from the 1KP project.

A

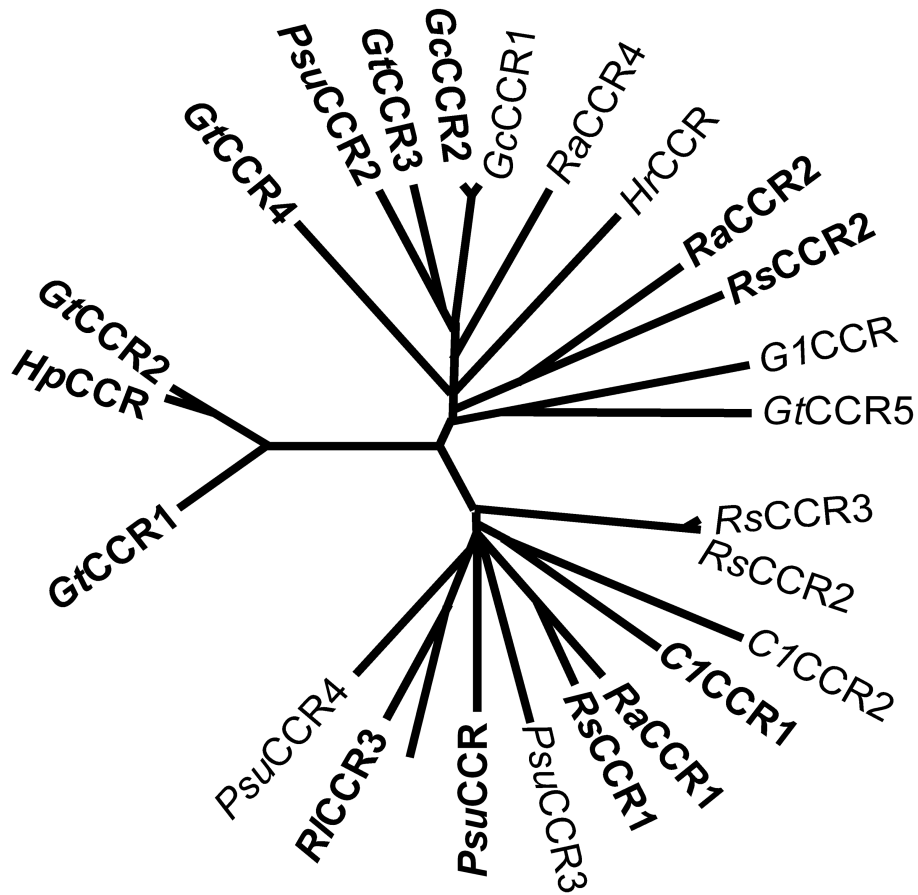

B

1-s light pulse

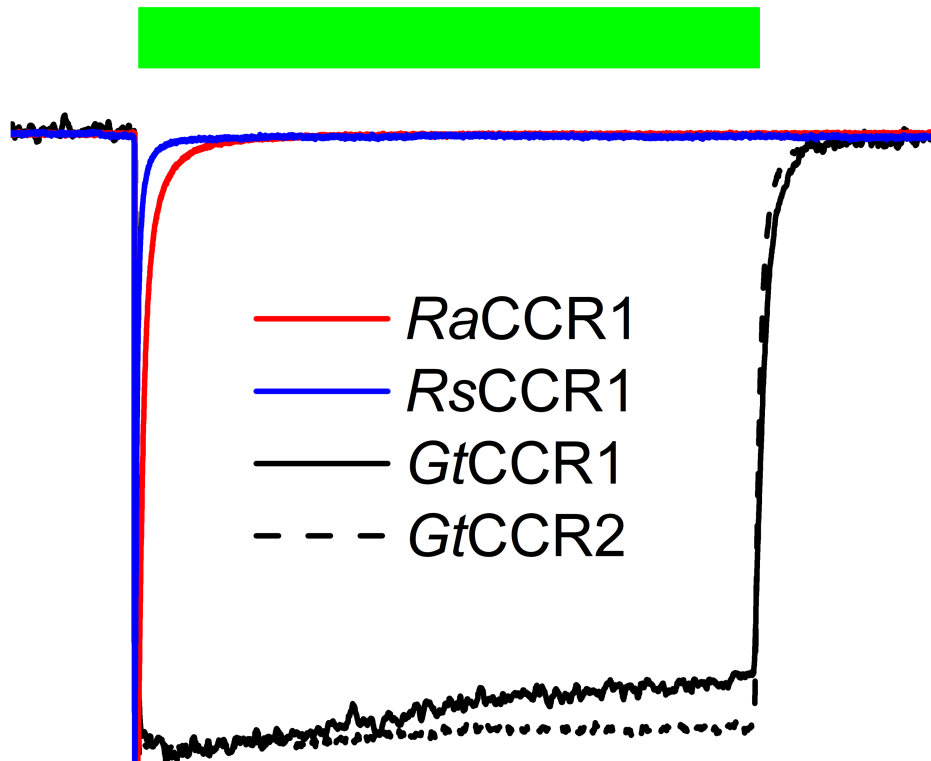

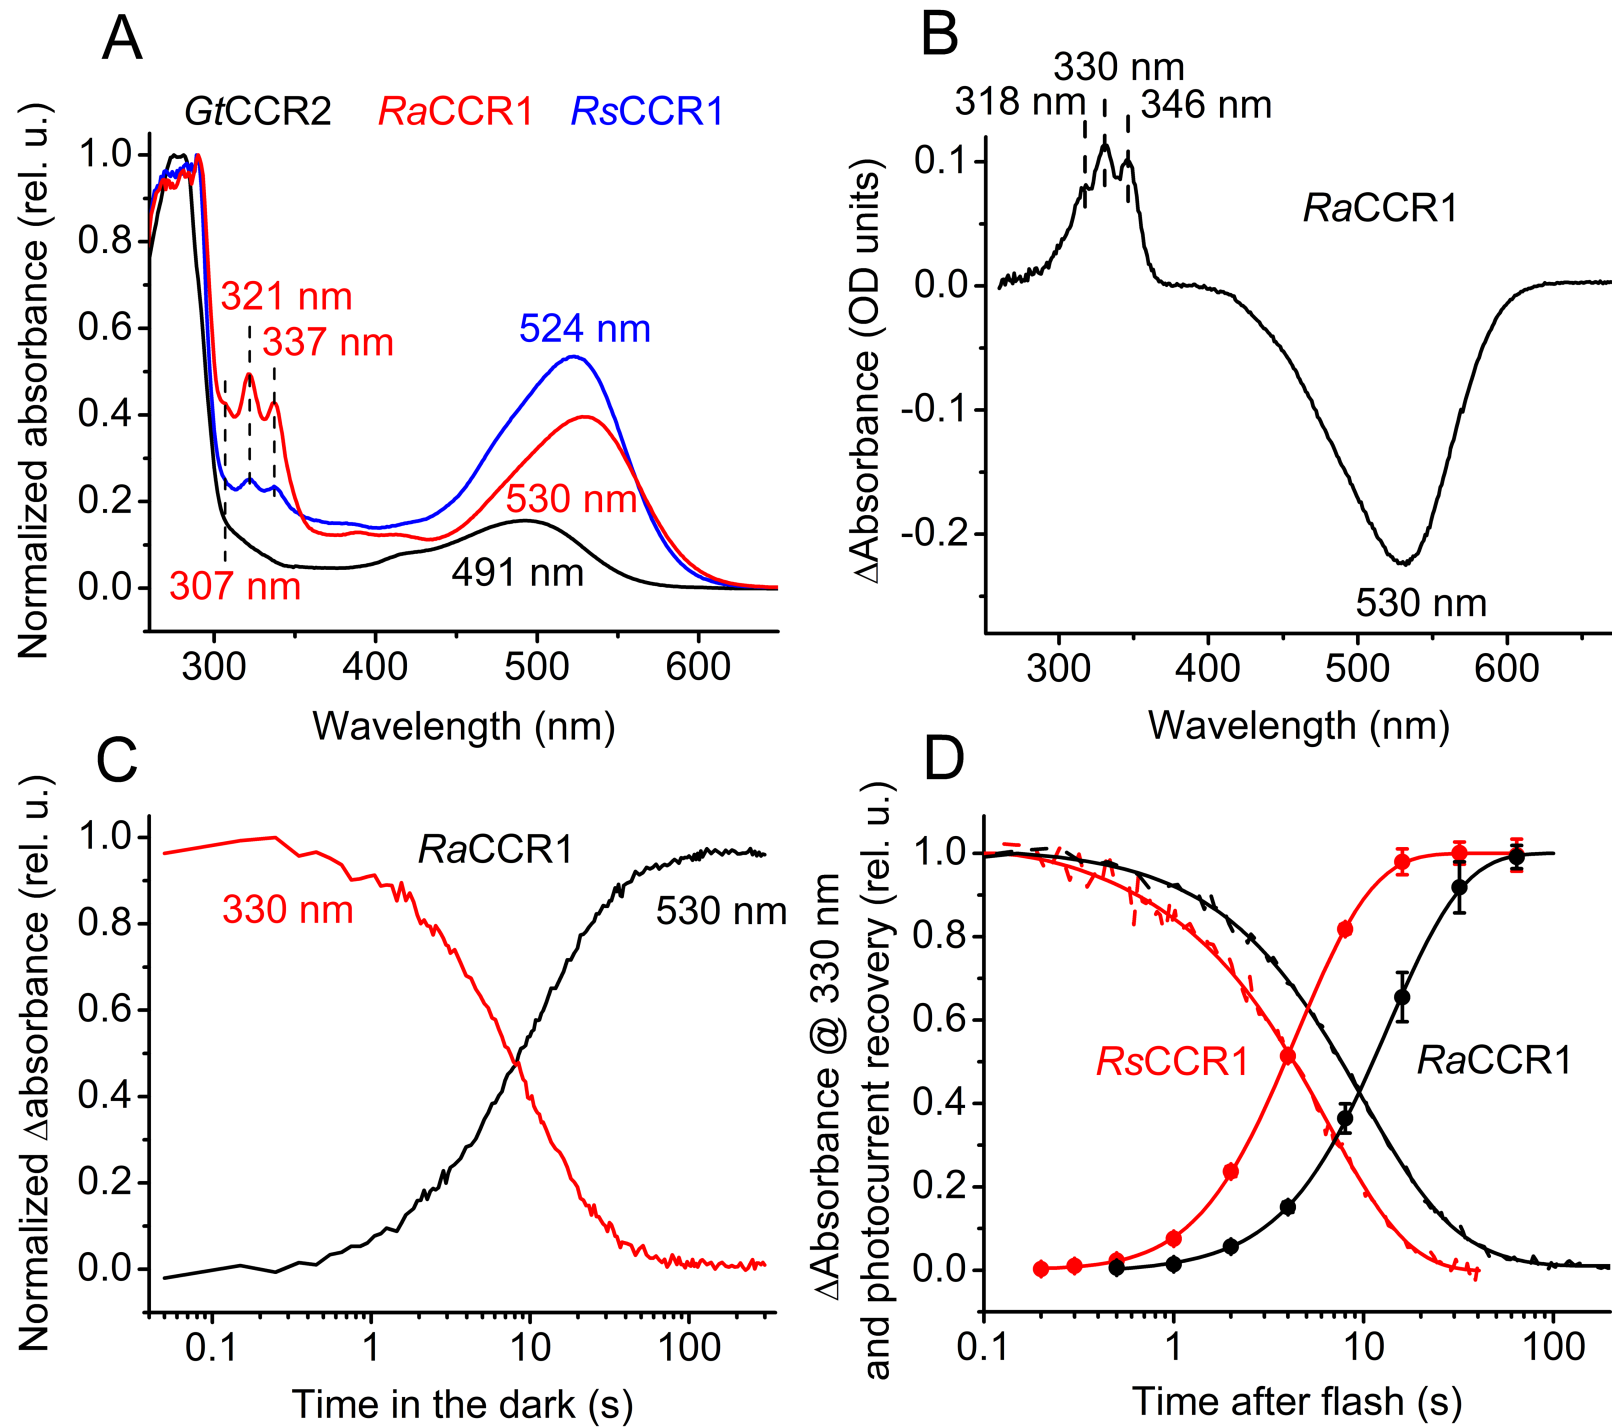

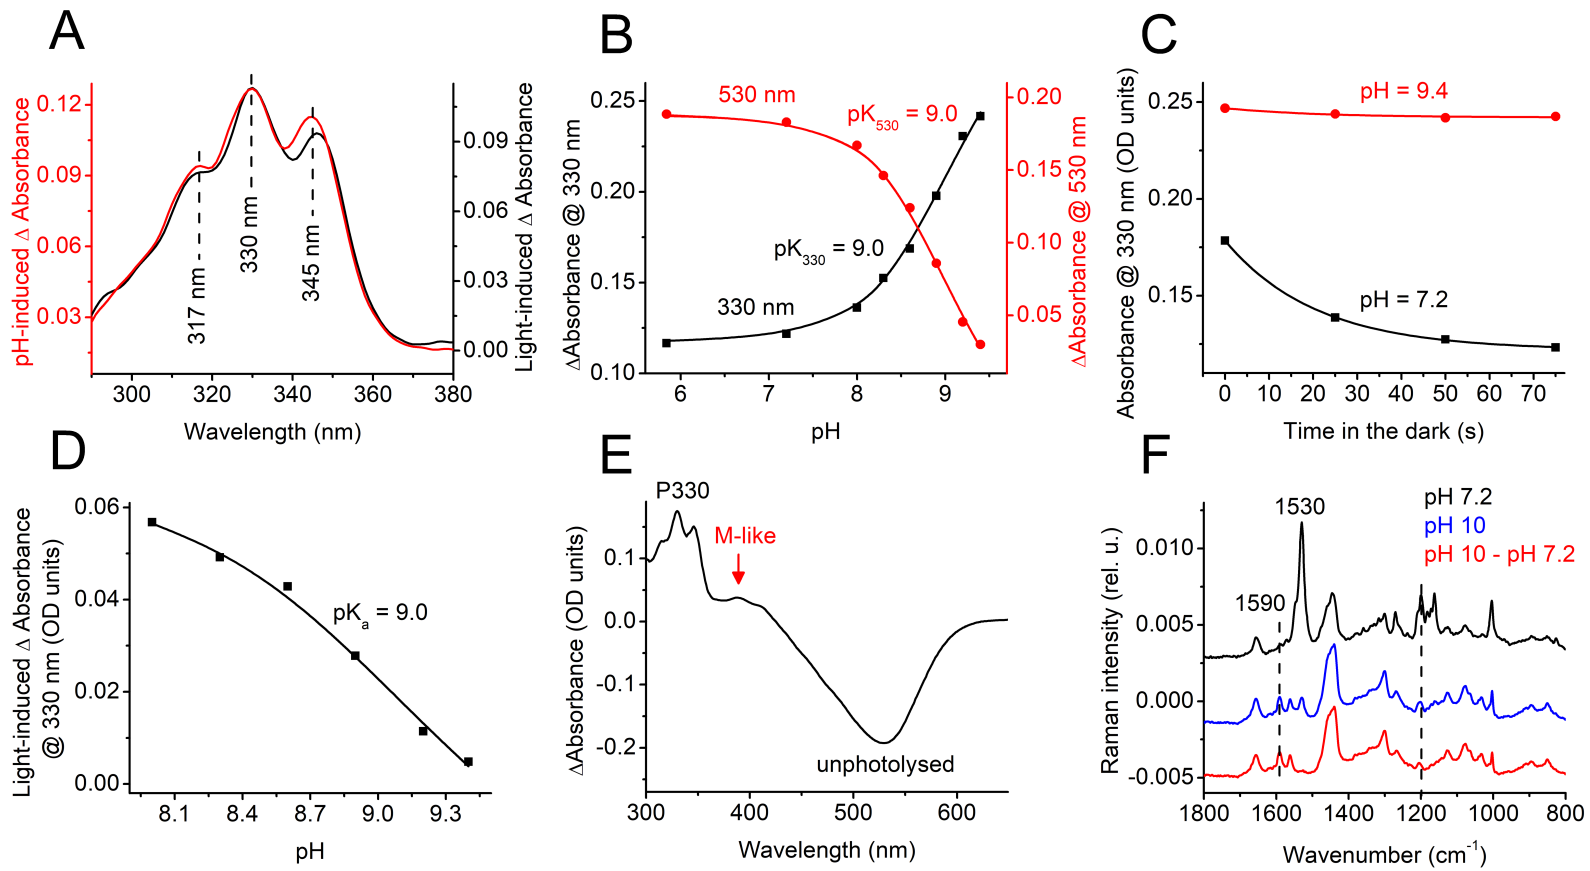

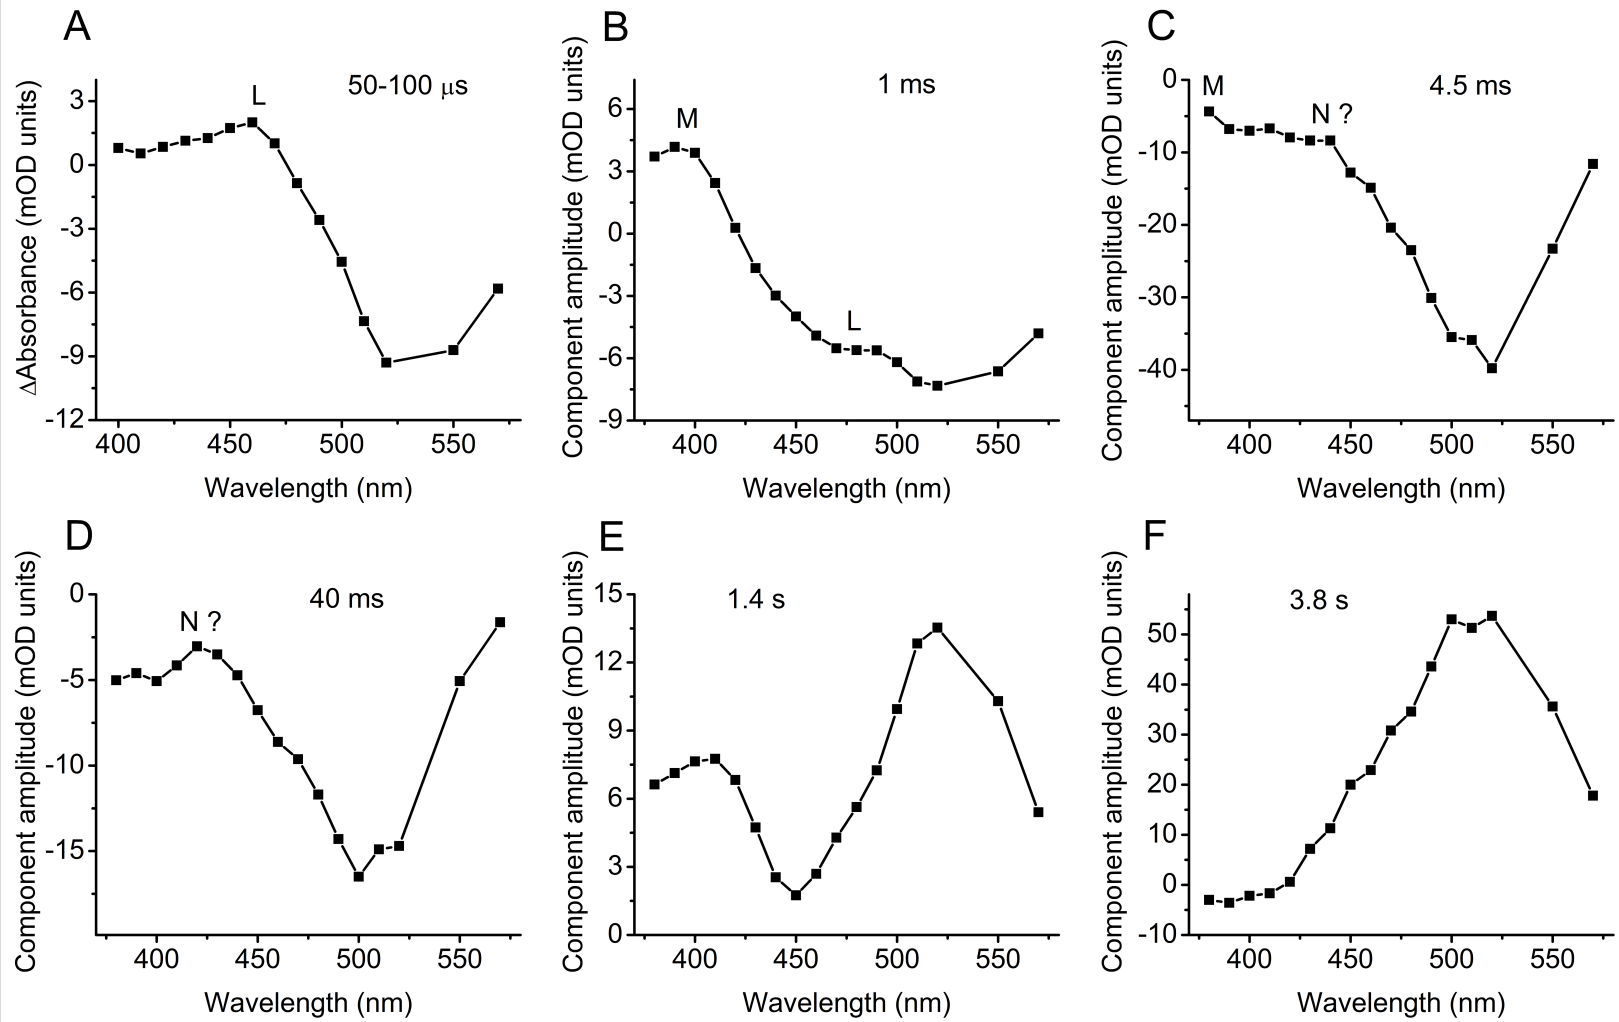



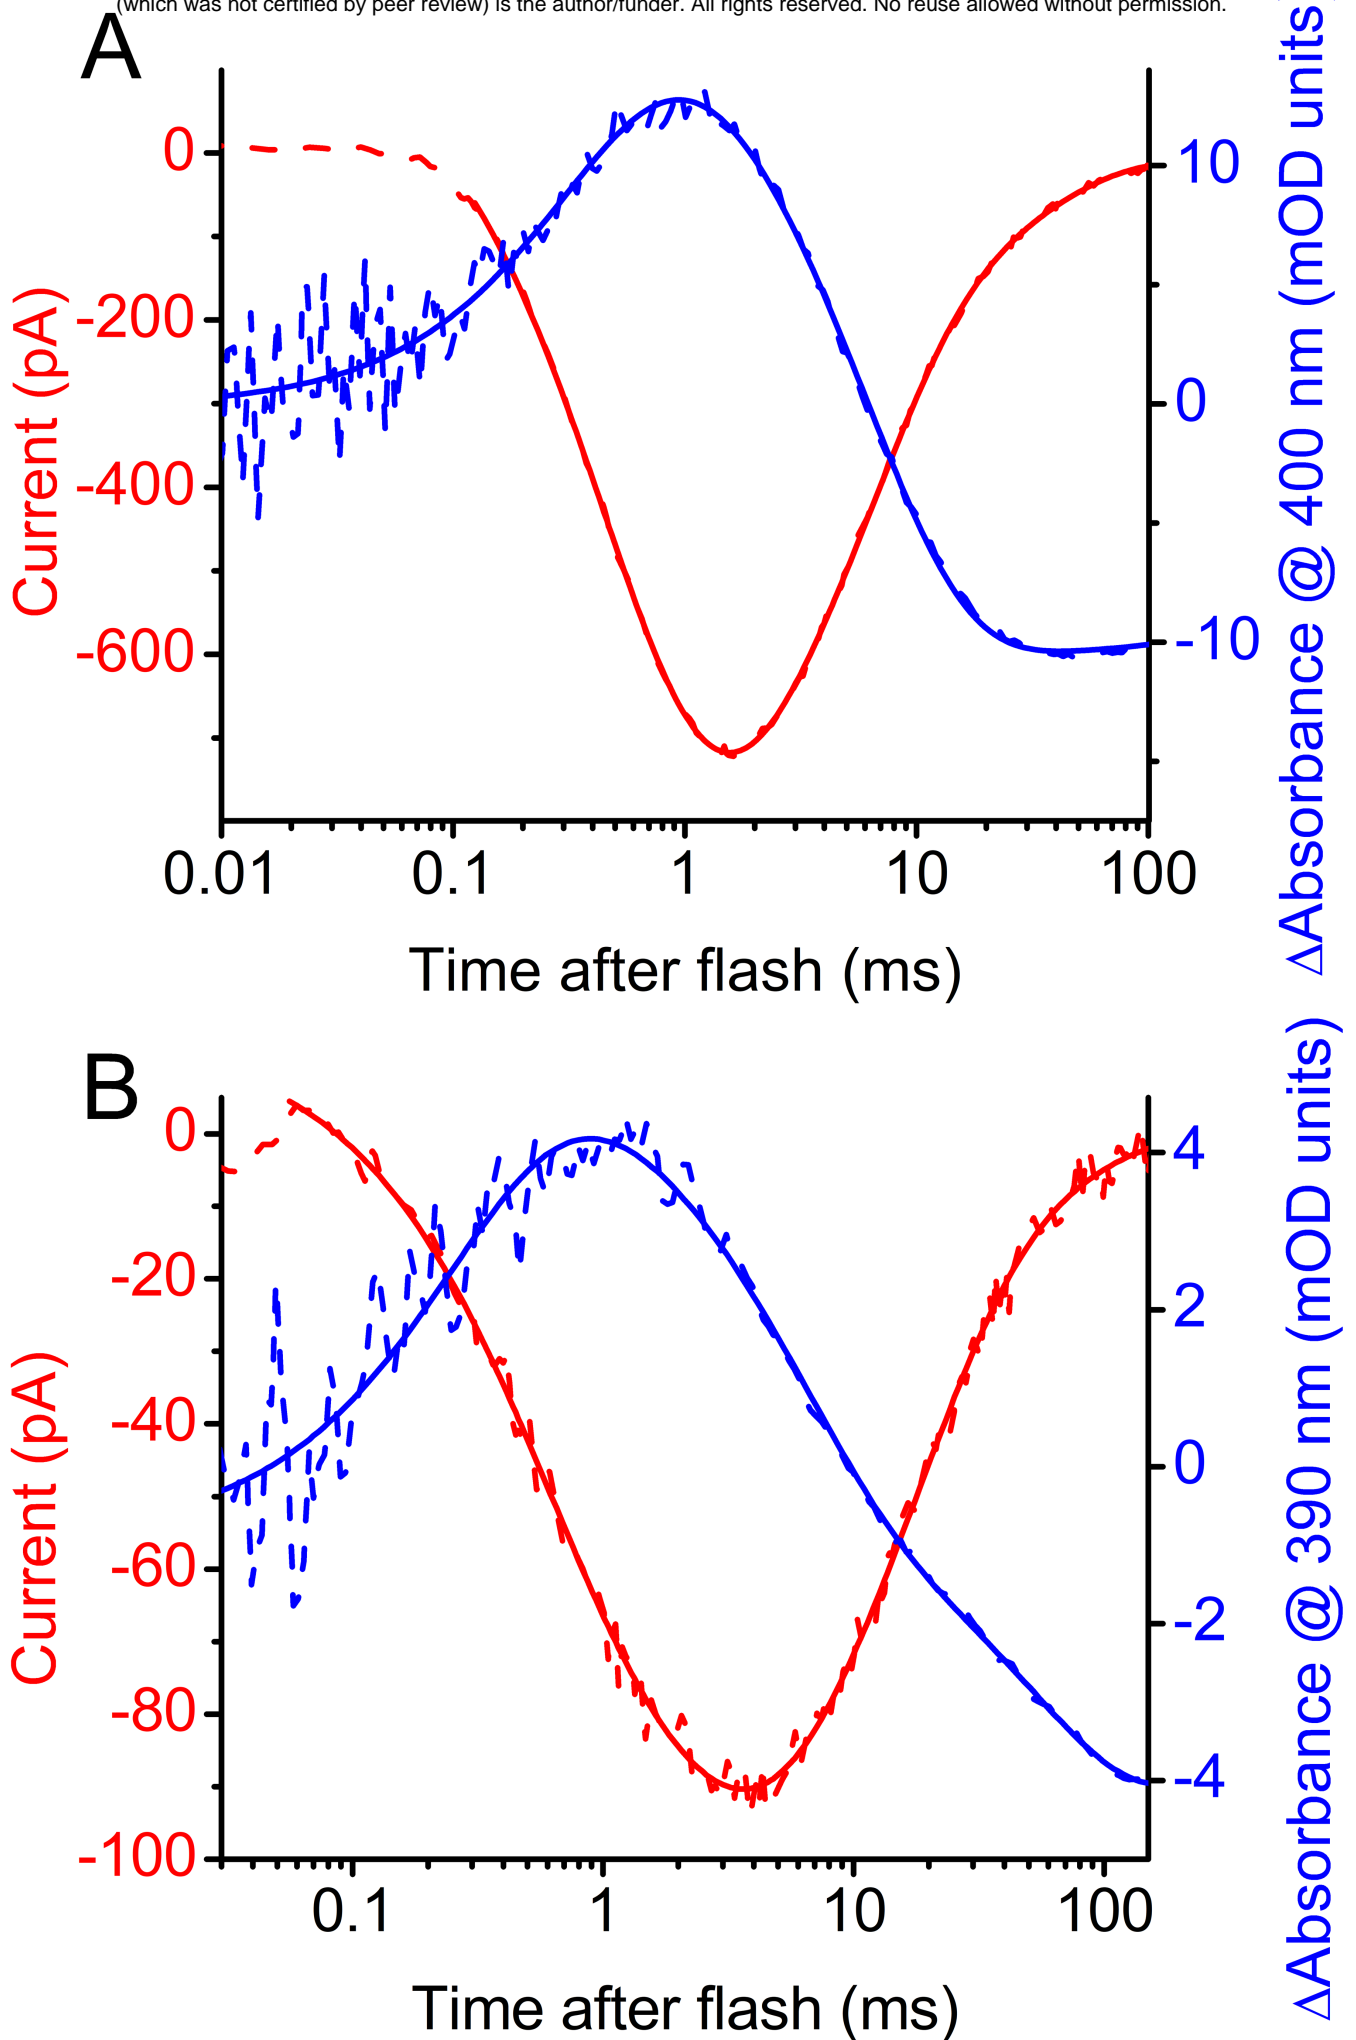

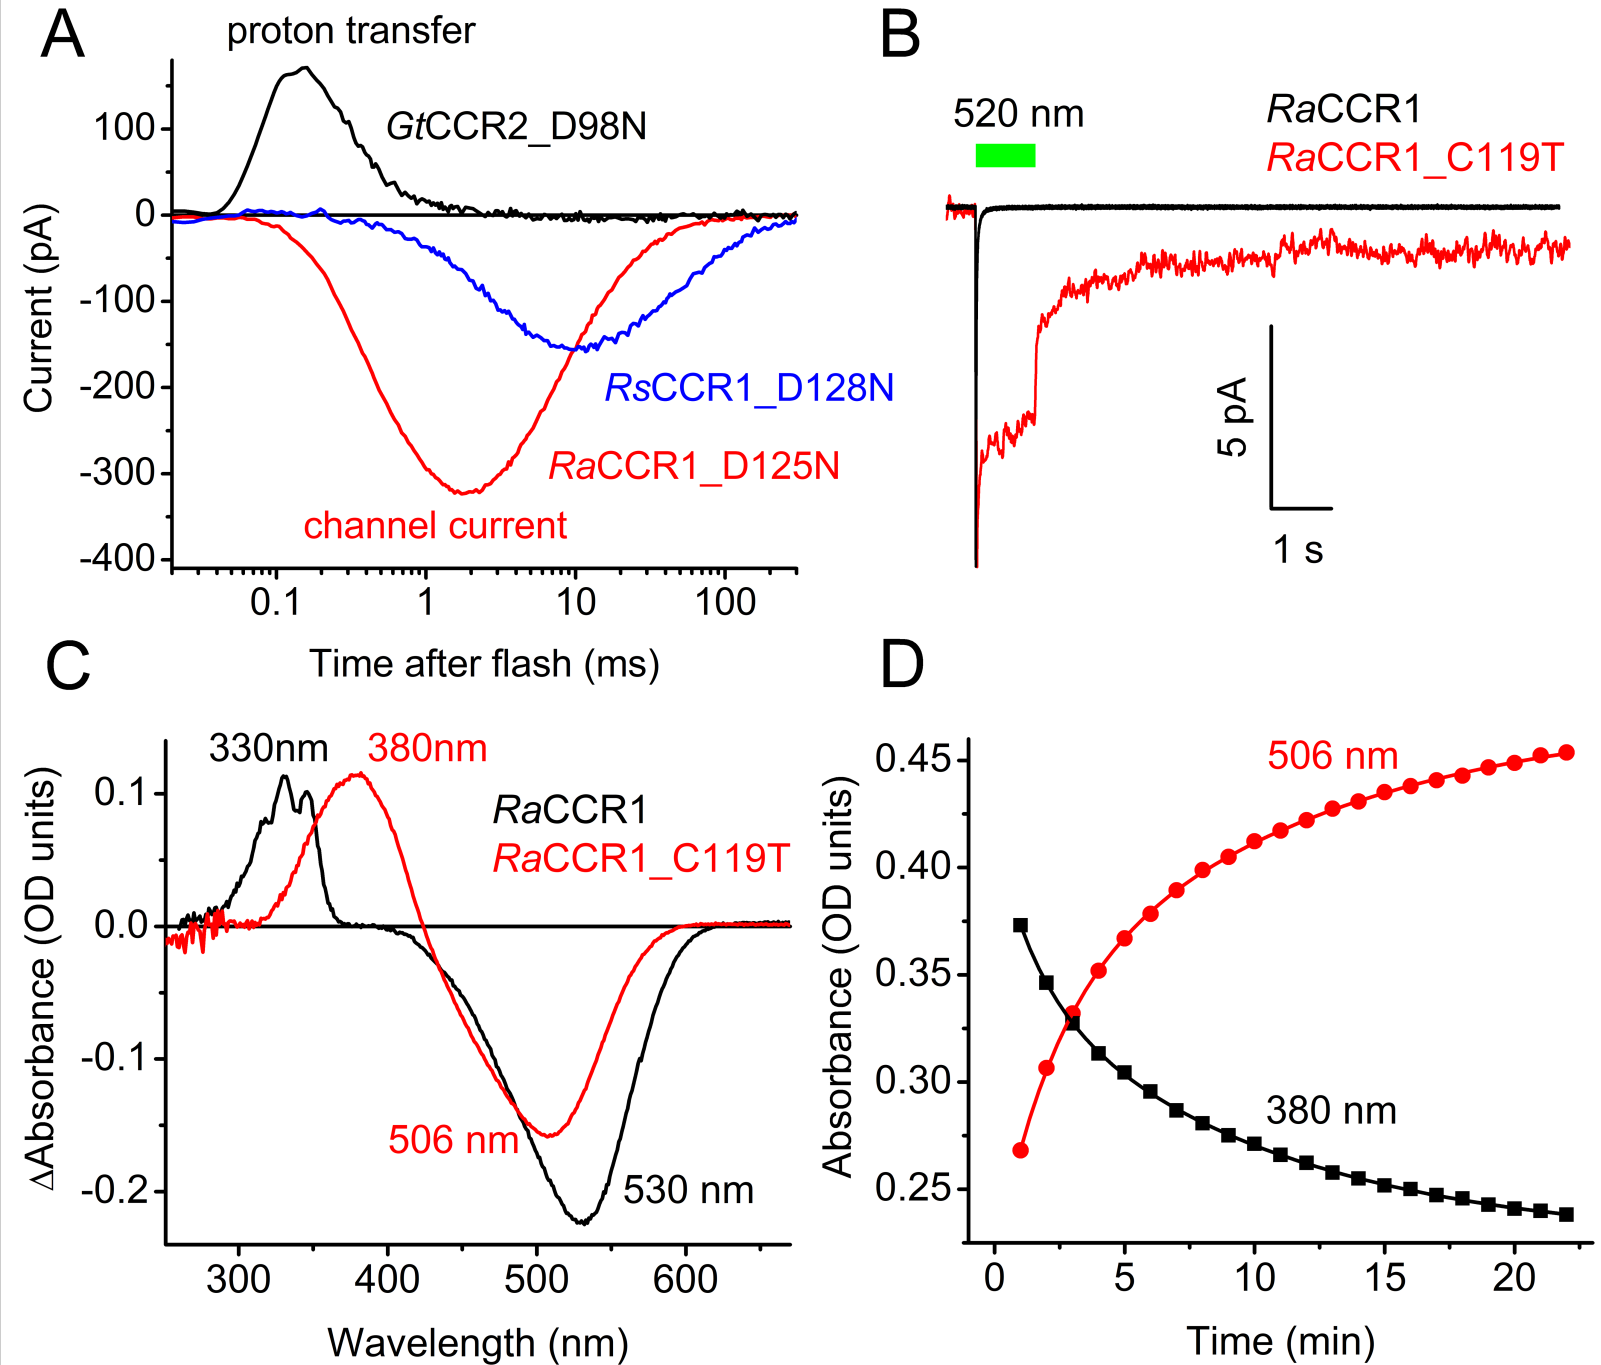

Source: https://www.biorxiv.org/content/10.1101/2020.03.20.001099v1.full.pdf
